1        **Prevalence of central obesity and its associated risk factors among adults in**  
2                    **Southeast Ethiopia: a community-based cross-sectional study**

3        Yohannes Tekalegn<sup>1\*</sup>, Damtew Solomon<sup>2</sup>, Biniyam Sahiledengle<sup>1</sup>, Tesfaye Assefa<sup>3</sup>,  
4        Wegene Negash<sup>3</sup>, Anwar Tahir<sup>3</sup>, Tadele Regassa<sup>2</sup>, Ayele Mamo<sup>4</sup>, Habtamu Gezahegn<sup>2</sup>,  
5        Kebebe Bekele<sup>5</sup>, Demisu Zenbaba<sup>1</sup>, Alelign Tasew<sup>1</sup>, Fikreab Desta<sup>1</sup>, Daniel Atilaw<sup>2</sup>,  
6        Zegeye Regassa<sup>3</sup>, Fikadu Nugusu, Zinash Teferu Engida<sup>1</sup>, Degefa Gomora Tesfaye<sup>6</sup>, Chala  
7        Kene<sup>6</sup>, Wondu Shiferaw Nigussie<sup>3</sup>, Dereje Chala<sup>3</sup>, Adisu Gemechu Abdi<sup>3</sup>, Girma Beressa,<sup>1</sup>  
8        Demelash Woldeyohannes<sup>7</sup>, Heather L. Rogers<sup>8</sup>, Lillian Mwanri<sup>9</sup>

9  
10        <sup>1</sup>Public Health Department, Goba Referral Hospital, Madda Walabu University, Bale Goba, Ethiopia

11        <sup>2</sup>Biomedical Department, Goba Referral Hospital, Madda Walabu University, Ethiopia

12        <sup>3</sup>Nursing Department, Goba Referral Hospital, Madda Walabu University, Bale Goba, Ethiopia

13        <sup>4</sup>Pharmacy Department, Goba Referral Hospital, Madda Walabu University, Bale Goba, Ethiopia

14        <sup>5</sup>Surgery Department, Goba Referral Hospital, Madda Walabu University, Bale Goba, Ethiopia

15        <sup>6</sup>Midwifery Department, Goba Referral Hospital, Madda Walabu University, Bale Goba, Ethiopia

16        <sup>7</sup>Wachemo University, School of Medicine and Health Science, Department of Public health, Hosana,  
17        Ethiopia

18        <sup>8</sup>Biocruces Bizkaia Health Research Institute, Barakaldo, Bizkaia, Spain 48903 and Ikerbasque Basque  
19        Foundation for Science Bilbao, Bizkaia, Spain 48009.

20        <sup>9</sup>Torrens University Australia, 88 Wakefield St, Adelaide SA 5000.

21  
22        \*Corresponding author: [Yohannes Tekalegn]

23        Email: [yohanneseafa@gmail.com](mailto:yohanneseafa@gmail.com)

24        Tel: +251913578901

## 26 **Abstract**

27 **Background:** Obesity and overweight are known are public health scourge challenges affecting  
28 populations across the world. These conditions have been associated with a wide range of chronic  
29 diseases including type 2 diabetes mellitus, cardiovascular disease, and cancers. In Ethiopia,  
30 literature regarding the burden of central (abdominal) obesity is scarce. This study aimed to fill  
31 this gap by assessing the prevalence and risk factors associated with central obesity among adults  
32 in Ethiopia.

33 **Methods:** From May to July 2021, a community-based cross-sectional survey was conducted on  
34 a sample of 694 adults aged  $\geq 18$  years in administrative towns of Bale zone, Southeast Ethiopia.  
35 Multi-stage sampling followed by systematic random sampling was employed to identify study  
36 participants. Waist and hip circumferences were measured using standard protocols. The World  
37 Health Organization STEPS wise tool was used to assess risk factors associated with central  
38 obesity. Bi-variable and multi-variable binary logistic regression were used to identify factors  
39 associated with central obesity. Adjusted odds ratios (AOR) and their corresponding 95%  
40 confidence intervals (CI) were reported to estimate the strength of associations.

41 **Results:** The overall prevalence of central obesity using waist circumference was 39.01% (15.44%  
42 for men and 53.12% for women). Multi-variable binary logistic regression analysis revealed that  
43 female sex (AOR=12.93, 95% CI: 6.74-24.79), Age groups: 30-39 years old (AOR=2.8, 95% CI:  
44 1.59-4.94), 40-49 years (AOR=7.66, 95% CI: 3.87-15.15), 50-59 years (AOR=4.65, 95% CI: 2.19-  
45 9.89),  $\geq 60$  years (AOR=12.67, 95% CI: 5.46-29.39), occupational status like: housewives  
46 (AOR=5.21, 95% CI: 1.85-14.62), self-employed workers (AOR=4.63, 95% CI: 1.62-13.24),  
47 government/private/non-government employees (AOR=4.68, 95% CI: 1.47-14.88) and skipping  
48 breakfast (AOR=0.46, 95% CI: 0.23-0.9) were significantly associated with central obesity.

49 **Conclusions:** Abdominal obesity has become an epidemic in towns of southeast Ethiopia, and the  
50 prevalence is higher among women. Female sex, older age group, being employed, not skipping  
51 breakfast were significantly associated with central obesity.

52 **Keywords:** Central obesity, abdominal obesity, obesity, prevalence, risk factors, Ethiopia

53  
54

## 55 **Introduction**

56 The World Health Organization (WHO) defines obesity as abnormal or excess fat accumulation  
57 that may impair health (1). Obesity has been associated with the imbalance between intake and  
58 energy expenditure, a condition that may be caused by either non-modifiable or modifiable factors  
59 (2). This caloric imbalance creates an excess accumulation of energy which in turn is stored in the  
60 body resulting in excess body weight. Although genetic factors are not modifiable, obesity can  
61 result from a complex interaction between environmental, socio-economic, and/or personal  
62 behaviors, factors that are modifiable. Addressing the modifiable factors play as one of the critical  
63 strategies in preventing obesity (3). Globally, the prevalence of overweight and obesity increased  
64 by 27.5% for adults and 47.1% for children between 1980 and 2013. The number of individuals  
65 with overweight and obesity increased from 857 million in 1980 to 2.1 billion in 2013 (4). If this  
66 secular trend continues persistently, 38% of the world's adult population will be overweight and  
67 another 20% will be obese by 2030 (5).

68 Worldwide, a high body mass index (BMI) has been reported to be responsible for 4 million deaths  
69 and 120 million disability-adjusted life years (6). Several studies have further documented obesity  
70 as the risk factor for many non-communicable diseases (NCDs) and chronic health conditions  
71 including hypertension, high lipid concentrations, type 2 diabetes, coronary heart disease, stroke,  
72 and certain cancers (7-22). Central (abdominal) obesity, measured in waist circumference, waist  
73 to hip ratio, and waist to height ratios, is highly linked with increased risk of morbidity and  
74 mortality and is considered to be superior to BMI in predicting cardiovascular disease and  
75 mortality risks (23-25).

76 Many low and middle-income countries (LMICs), including Ethiopia, currently face a double  
77 burden of malnutrition (26). While LMICs are dealing with problems of infectious diseases and  
78 undernutrition, they are also experiencing a rapid increase in non-communicable disease risk  
79 factors like overweight and obesity (1, 27-29), and the emergence of Corona Virus Disease  
80 (COVID-19) pandemic has further challenged health systems, economies and populations across  
81 the globe, but and more severely in LMICs (30, 31). Evidence suggests that NCDs are dramatically  
82 increasing in Ethiopia and it was estimated that NCDs were responsible for 711 deaths per 100,000  
83 population in 2015 (32). Cardiovascular diseases, cancer, diabetes, and mental disorders were

84 responsible for 30% of the total disease burden in Ethiopia as measured in age-standardized  
85 disability-adjusted life years (DALYs) rates in 2017 (33).

86 In Ethiopia, epidemiological studies regarding the prevalence, distribution, and determinants of  
87 obesity are meager. More specifically, few studies have assessed the prevalence and risk factors  
88 of central (abdominal) obesity (34-39), a superior predictor of NCDs. The prevalence reported in  
89 the aforementioned previous studies ranges from 15.5% in the northern part of Ethiopia (36) to  
90 37.4% in southwest Ethiopia (39). Similarly, risk factors identified by those studies vary from  
91 district to district which warrants studying the prevalence and context-based risk factors in our  
92 study setting which has implications for prevention efforts / public health campaigns. To the best  
93 of our knowledge, there is no published evidence on the magnitude and factors associated with  
94 central obesity in Southeast Ethiopia. The current study aims to assess the prevalence of central  
95 (abdominal) obesity and its associated risk factors in the administrative towns of Bale Zone,  
96 Southeast Ethiopia.

## 97 **Methods and Materials**

### 98 **Study design, setting and subjects**

99 From May to July 2021, a community-based cross-sectional study was conducted to assess the  
100 prevalence of central (abdominal) obesity among adults ( $\geq 18$  years) in the administrative towns of  
101 Bale zone, Southeast Ethiopia. All adults residing in the study area for at least 6 months were  
102 eligible for inclusion. However, potential participants were excluded if they had: psychiatric  
103 problems, hearing impairments, body deformities (kyphosis and scoliosis), other debilitations and/  
104 or handicaps. Pregnant women were also ineligible for inclusion. Bale zone, one of the Regional  
105 States in Ethiopia in the Southeastern part of Oromia (an area of 43,690.56 km<sup>2</sup>), is located  
106 between 5<sup>o</sup> 22' – 8<sup>o</sup> 08' latitude north and between 38<sup>o</sup> 41'- 40<sup>o</sup> 44' longitude east. (**Figure 1**).  
107 According to the Central Statistical Agency (CSA), in 2007 (latest available report), the Bale zone,  
108 had a total population of 1,402,492, including 713,517 men and 688,975 women, an increase of  
109 15.16% from the 1994 Census. Of the total inhabitants in Bale Zone, 166,758 (26.20% were) urban  
110 dwellers and 44,610 (3.18% were) pastoralists. The zone comprises 18 districts and a total of  
111 297,081 (an average of 4.72 persons per household) households. There are two administrative  
112 towns in the zone namely Robe and Goba towns. Furthermore, each administrative town is divided

113 into smaller administrative clusters known as ‘*gots*’. Robe and Goba towns have 36 and 24 *gots*  
114 respectively. According to the 2021 administrative report, Robe and Goba towns respectively had  
115 population of 73,152 and 52,785 people.

#### 116 **Sample size determination and sampling procedures**

117 Based on the total population in the zone, the study sample size of 700 individuals was calculated  
118 using OpenEpi (Version 3, an open-source calculator) considering the following parameters: 95%  
119 level of confidence, 4% margin of error, 24.4% reported prevalence of abdominal obesity by the  
120 previous study in Dilla town, South Ethiopia (38), design effect of 2, and non-response rate of  
121 5%.. A multi-stage stratified sampling and, systematic random sampling were employed to select  
122 the study participants for inclusion in the study. Initially, the study populations sampling was  
123 stratified into the two (Robe and Goba) towns, followed by stratification into randomly selected  
124 clusters (*gots*). One third of clusters were selected from each town, and proportionate to their  
125 number, eight and 12 *gots* were selected from Goba and Robe respectively. Furthermore,  
126 households in the sampled clusters were selected using systematic sampling techniques and one  
127 adult per sampled household was selected using the lottery method.

#### 128 **Data collection and measurement procedures**

129 Interviewer-administered, structured questionnaires were used to collect data on socio-  
130 demographic and behavioural characteristics followed by physical measurements of weight,  
131 height, waist, and hip circumferences. A standard questionnaire was adapted from the WHO  
132 STEPS-wise questionnaire for chronic disease risk factor surveillance (40). The English version  
133 of the questionnaire was translated to the local languages spoken in the study area, Afan Oromo  
134 and Amharic. After the translation into local languages, the questionnaire was back-translated to  
135 English to check the consistency. Weight was measured using an electronic digital weight scale  
136 by putting the scale on a firm flat surface after participants took off footwear, heavy clothes, and  
137 empty their pockets for heavy items. Participants’ height measurements were taken in a standing  
138 position by a portable height measuring board placed on a firm surface against a wall. With  
139 participants facing the data collector, feet placed together, and eyes leveled at the ears, readings  
140 were taken in centimeters (to the nearest millimeter). With the participants’ arms relaxed at the  
141 sides, the waist circumferences were measured by constant tension tape at the end of a normal

142 expiration; at the midpoint between the lower margin of the last palpable rib and the top of the  
143 iliac crest (hip bone). Waist measurements read at the level of the tape to the nearest millimeter,  
144 while ensuring the tape was comfortably tight enough not to cause compression of the skin. Hip  
145 circumferences were measured by constant tension tape with the arms relaxed at the sides at the  
146 maximum circumference over the buttocks. Hip circumferences were measured and read at the  
147 level of the tape to the nearest millimeter. Further details on the study physical measurement  
148 protocols are consistent with the WHO STEPS-wise instrument guideline (41).

149 Data collection was conducted by six data collectors (three male-female pairs) with degrees of  
150 bachelor in health sciences (Nursing, Public Health, and Midwifery) Female and male data  
151 collectors respectively collected female and male participants' data. Two supervisors with a degree  
152 master of public health took part in overseeing the data collection process. Data collectors and  
153 supervisors were provided with a two-day intensive training on the objective of the study,  
154 administration protocols for the questionnaires, administration protocols for anthropometric  
155 measurements (weight, height, waist, and hip circumferences), and how to maintain confidentiality  
156 and privacy of the study participants. With assistance from the study supervisors, all questionnaires  
157 were checked every day by data collectors for completeness before leaving the data collection site  
158 (household).

### 159 **Outcome variable**

160 Central (abdominal) obesity is the dependent variable for this study, which is derived from waist  
161 circumference measurement. As per World Health Organization recommendations, waist-  
162 circumference >94 centimeters for males and >80 centimeters for females were categorized as  
163 central obesity (23). Individuals with central obesity were coded as “1” and others were coded as  
164 “0”.

### 165 **Independent variables**

166 Independent variables included sociodemographic and behavioral variables. Sociodemographic  
167 variables included the town of residence (Robe or Goba); age (categorized into 18-29, 30-39, 40-  
168 49, 50-59, and  $\geq 60$  years); sex (male or female), marital status (categorized as never married,  
169 married/cohabiting, or divorced/separated/widowed); educational status (categorized as no formal  
170 education, secondary education, or diploma and above); occupational status (housewives, self-

171 employed, government/non-government/private employee, student/unemployed, or Retired);  
172 family size (categorized as  $\leq 2$ ,  $>2$ ); and wealth index (computed by principal component analysis  
173 using household assets and rank-ordered as low, medium or high wealth index terciles). Behavioral  
174 variables included characteristics such as fruit and vegetable consumption (categorized as less than  
175 five servings of fruit and/or vegetables per day, or five or more servings of fruit and/or vegetables  
176 per day), skipping breakfast (categorized as yes or no), avoidance of eating foods prepared outside  
177 the home (categorized as yes or no) and levels of physical activities [derived by calculating the  
178 metabolic equivalent value (MET) - study participants with an equivalent combination of moderate  
179 and vigorous-intensity physical activity achieving at least 600 MET-minutes were categorized as  
180 sufficient level while the others were categorized as insufficient physical activity levels], sedentary  
181 activities were measure by adding total time spent sitting or reclining on a typical day, current  
182 smokers of tobacco were categorized as yes or no and participants who consumed alcohol were  
183 categorized as never drank, consumed in last 12 months, or consumed in last 30 days.  
184 Measurements including fruit and/or vegetable consumption, level of physical activities, alcohol,  
185 and/or tobacco consumption were assessed and analyzed using World Health Organization (WHO)  
186 STEPS Surveillance tool recommendations (41).

### 187 **Data analysis procedures**

188 The data was coded and entered into EpiData Version 3.1 and cleaned, processed, and analyzed  
189 using SPSS version 25 and STATA version 14. The variables were described using mean,  
190 frequencies, proportions, and tables. The Chi-square test was used to check the statistical  
191 difference of the distribution of categorical independent variables between men and women. A  
192 two-sample Wilcoxon rank-sum (Mann-Whitney) test was used to check the statistical difference  
193 in the distribution of continuous independent variables between men and women. Both bi-variable  
194 and multi-variable binary logistic regression analyses were used to identify factors associated with  
195 the outcome variable. Variables having a p-value of less than 0.25 in the bi-variable binary logistic  
196 regression model were included in the multivariable binary logistic regression analysis model.  
197 After checking for multi-collinearity, enter method was used to run the model. The logit of the  
198 dependent variable was checked for outlier and 7 outlying values (having standardized residual  
199  $>2.58$  at the level of  $\alpha < 0.01$ ) were excluded from the analysis. Hosmer and Lemeshow's goodness  
200 of model fit was checked and the data fitted the model well ( $p=0.92$ ). Multi-collinearity between



201 independent variables was checked using variance inflation factor (VIF), the mean VIF was 2.1  
202 which is less than the recommended cut-off values (42). Finally, adjusted odds ratios with 95%  
203 confidence intervals were used to estimate the strength of associations between the outcome  
204 variable and independent variables. All tests were two-tailed and statistical significances were  
205 declared at p-value <0.05.

## 206 Ethical considerations

207 Ethical clearance and support letters to introduce the researchers and the study to respective study  
208 areas were obtained from the ethical review committee of Madda Walabu University. Permission  
209 letters to conduct the survey were obtained from the respective authorities of the two towns (Goba  
210 and Robe). The methods were conducted following the tenets of the Helsinki declaration. To obtain  
211 oral informed consent an information sheet was read to all eligible study participants before data  
212 were collected. The privacy of the respondents was respected and data were de-identified before  
213 analysis and were reported in aggregate.

## 214 Results

### 215 Sociodemographic characteristics of study participants

216 A total of 694 adults (259 men and 435 women) participated in this study, a response rate of 99.1%.  
217 Four hundred and eight (58.8%) and 286 (41.2%) study participants were from Robe and Goba  
218 town respectively. Participants' age ranged from 18-95 years old. Men participants' median age  
219 was 41 years old with an interquartile range (IQR) of 28-55 years. women's median age was 32  
220 years with an IQR of 25-45 years (**Table 1**).

221 **Table 1:** Sociodemographic characteristics of study participants in administrative towns of Bale  
222 Zone, Southeast Ethiopia, 2021.

| Variables                | Total (%),<br>N=694 | Men (%),<br>n=259 | Women<br>(%),<br>n=435 | Pearson<br>chi<br>square<br>(df) | p-value |
|--------------------------|---------------------|-------------------|------------------------|----------------------------------|---------|
| <b>Town of residence</b> |                     |                   |                        |                                  |         |
| Robe                     | 408 (58.8)          | 161 (62.2)        | 247 (56.8)             | 29.2 (4)<br>(1)                  | <0.001* |
| Goba                     | 286 (41.2)          | 98 (37.8)         | 188 (43.2)             |                                  |         |



|                                 |            |            |             |           |         |
|---------------------------------|------------|------------|-------------|-----------|---------|
| <b>Age category</b>             |            |            |             |           |         |
| 18-29 years                     | 262 (37.8) | 79 (30.6)  | 183 (42.2)  | 29.2 (4)  | <0.001* |
| 30-39 years                     | 134 (19.4) | 41 (15.9)  | 93 (21.4)   |           |         |
| 40-49 years                     | 103 (14.9) | 37 (14.3)  | 66 (15.2)   |           |         |
| 50-59 years                     | 92 (13.3)  | 52 (20.2)  | 40 (9.2)    |           |         |
| ≥60 years                       | 101(14.6)  | 49 (19.0)  | 52 (12.0)   |           |         |
| <b>Educational status</b>       |            |            |             |           |         |
| No formal education             | 98 (14.1)  | 23 (8.9)   | 75 (17.2)   | 33.7 (3)  | <0.001* |
| Primary education (1-8)         | 205 (29.6) | 54 (20.9)  | 151 (34.7)  |           |         |
| Secondary education (9-12)      | 219 (31.6) | 94 (36.4)  | 125 (28.74) |           |         |
| Diploma and above               | 171 (24.7) | 87 (33.7)  | 84 (19.3)   |           |         |
| <b>Ethnicity</b>                |            |            |             |           |         |
| Oromo                           | 546 (78.7) | 216 (83.4) | 330 (75.9)  | 4.8 (3)   | 0.1     |
| Amhara                          | 114 (16.4) | 33 (12.8)  | 81 (18.6)   |           |         |
| Wolaita                         | 11 (1.6)   | 4 (1.5)    | 7 (1.6)     |           |         |
| Others <sup>a</sup>             | 13 (1.9)   | 4 (1.5)    | 9 (2.0)     |           |         |
| Refused                         | 10 (1.4)   | 2 (0.8)    | 8 (1.8)     |           |         |
| <b>Religion</b>                 |            |            |             |           |         |
| Muslim                          | 291 (41.9) | 116 (44.8) | 175 (40.2)  | 2.79 (3)  | 0.4     |
| Orthodox Christian              | 333 (48.0) | 119 (46.0) | 214 (49.2)  |           |         |
| Protestant Christian            | 69 (9.9)   | 23 (8.9)   | 46 (10.6)   |           |         |
| Catholic                        | 1 (0.1)    | 1 (0.4)    | 0 (0.0)     |           |         |
| <b>Marital status</b>           |            |            |             |           |         |
| Never married                   | 139 (20.0) | 68 (26.3)  | 71 (16.3)   | 27.4 (2)  | <0.001* |
| Married/cohabiting              | 465 (67.0) | 177 (68.3) | 288 (66.2)  |           |         |
| Divorced/separated/widowed      | 90 (13.0)  | 14 (5.4)   | 76 (17.5)   |           |         |
| <b>Occupational status</b>      |            |            |             |           |         |
| Housewives                      | 239 (34.8) | -          | 239 (55.2)  | 219.1 (4) | <0.001* |
| Self-employed                   | 195 (28.4) | 112 (44.1) | 83 (19.2)   |           |         |
| Government/private/NGO employed | 113 (16.5) | 69 (27.2)  | 44 (10.2)   |           |         |
| Retired                         | 38 (5.5)   | 25 (9.8)   | 13 (3.0)    |           |         |
| Student/unemployed              | 102 (14.8) | 48 (18.9)  | 54 (12.5)   |           |         |
| <b>Family size</b>              |            |            |             |           |         |
| ≤2                              | 391 (56.3) | 121(46.7)  | 270 (62.1)  | 15.5 (1)  | <0.001* |
| >2                              | 303 (43.7) | 138 (53.3) | 165 (37.9)  |           |         |
| <b>Wealth index</b>             |            |            |             |           |         |
| Low                             | 279 (40.2) | 85 (32.8)  | 194 (44.6)  | 10.5 (2)  | 0.005*  |
| Medium                          | 161 (23.2) | 63 (24.3)  | 98 (22.5)   |           |         |
| High                            | 254 (36.6) | 111 (42.9) | 143 (32.9)  |           |         |

223 **Notes:** <sup>a</sup>Somali, Gurage, and Tigre; **Z**, critical value for two-sample Wilcoxon rank-sum (Mann-Whitney) test; \*significant at p <0.05

224

225

226 **Behavioral characteristics of the study participants**

227 More than half (58%) of the study participants consumed less than five servings of fruit and/or  
 228 vegetable per day. The mean number of days of fruit were consumed per week was 2.3 days.  
 229 Approximately 15% of the study participants reported skipping breakfast and another 15% avoided  
 230 eating foods prepared outside the home. Nearly 29% of the study participants had an insufficient  
 231 level of physical activity as per World Health Organization recommendations (**Table 2**).

232 **Table 2:** Behavioral characteristics of study participants in administrative towns of Bale zone,  
 233 Southeast Ethiopia, 2021.

234

| Variables                                                               | Total (%),<br>N=694 | Men (%),<br>n=259 | Women<br>(%),<br>n=435 | Pearson<br>chi<br>square<br>(df) | p-value |
|-------------------------------------------------------------------------|---------------------|-------------------|------------------------|----------------------------------|---------|
| <b>Number of days eat fruit and/or vegetables on average per week</b>   |                     |                   |                        |                                  |         |
| No fruit and/or vegetable                                               | 58 (8.4)            | 30                | 28 (6.4)               | 77 (3)                           | 0.05    |
| 1-2                                                                     | 349 (50.4)          | 118               | 231(53.1)              |                                  |         |
| 3-4                                                                     | 219 (31.6)          | 87                | 132 (30.3)             |                                  |         |
| >=5                                                                     | 67 (9.7)            | 23                | 44 (10.1)              |                                  |         |
| <b>Number of servings of fruit and/or vegetables on average per day</b> |                     |                   |                        |                                  |         |
| 1-2 servings                                                            | 49 (8.1)            | 17 (8.0)          | 32 (8.2)               | 0.4 (2)                          | 0.8     |
| 3-4 servings                                                            | 301 (49.8)          | 102 (48.3)        | 199 (50.9)             |                                  |         |
| >=5 servings                                                            | 252 (41.7)          | 92 (43.6)         | 160 (40.9)             |                                  |         |
| <b>Avoid eating foods prepared outside of a home</b>                    |                     |                   |                        |                                  |         |
| Yes                                                                     | 584 (84.6)          | 176 (68.2)        | 408 (94.4)             | 85.4 (1)                         | <0.001* |
| No                                                                      | 106 (15.4)          | 82 (31.8)         | 24 (5.6)               |                                  |         |
| <b>Skip breakfast</b>                                                   |                     |                   |                        |                                  |         |
| No                                                                      | 592 (14.5)          | 210 (81.4)        | 382 (88.0)             | 5.7 (1)                          | 0.01*   |
| Yes                                                                     | 100 (88.5)          | 48 (18.6)         | 52 (12.0)              |                                  |         |
| <b>Level of physical activity</b>                                       |                     |                   |                        |                                  |         |
| Insufficient physical activity                                          | 195 (28.8)          | 31 (12.3)         | 164 (38.6)             | 53.3 (1)                         | <0.001* |
| Sufficient physical activity                                            | 482 (71.2)          | 221 (87.7)        | 261 (61.4)             |                                  |         |

|                                                                                      |                |                 |                 |           |       |
|--------------------------------------------------------------------------------------|----------------|-----------------|-----------------|-----------|-------|
| <b>Number of days fruit consumed in a typical week ( mean ± SD)</b>                  | 2.33 ± 1.60    | 2.31 ± 1.57     | 2.35 ± 1.62     | Z= 0.1    | 0.9   |
| <b>Number of days vegetables consumed in a typical week ( mean ± SD)</b>             | 3.59 ± 1.97    | 3.49 ± 1.83     | 3.66 ± 2.05     | Z = -0.45 | 0.6   |
| <b>Number of servings of fruit on average per day ( mean ± SD)</b>                   | 2.11 ± 0.86    | 2.25 ± 0.99     | 2.04 ± 0.77     | Z = 2.28  | 0.02* |
| <b>Number of servings of vegetables on average per day ( mean ± SD)</b>              | 2.11 ± 0.96    | 2.11 ± 0.98     | 2.12 ± 0.95     | Z = -0.28 | 0.7   |
| <b>Number of servings of fruit and/or vegetables on average per day ( mean ± SD)</b> | 4.2 ± 1.40     | 4.36 ± 1.54     | 4.14 ± 1.31     | Z = 1.35  | 0.1   |
| <b>Minutes spent on sedentary activities on average per day ( mean ± SD)</b>         | 178.1 ± 128.98 | 166.65 ± 125.25 | 184.90 ± 130.80 | Z = -1.78 | 0.07  |

235 Notes: Z, critical value for two-sample Wilcoxon rank-sum (Mann-Whitney) test; \*significant at  
 236 p < 0.05  
 237

### 238 Alcohol and tobacco use behavioural characteristics of the study participants

239 Only 7 (1%) indicated currently smoking tobacco products. Two hundred twenty-two (32.0%)  
 240 consumed alcohol in the past twelve months (Table 3).

241 **Table 3:** Alcohol and tobacco consumption behavior of study participants in administrative  
 242 towns of Bale zone, Southeast Ethiopia, 2021.

| <b>Variables</b>                               | <b>Total (%)<br/>(N=694)</b> | <b>Men (%),<br/>n=259</b> | <b>Women (%)<br/>,<br/>n=435</b> | <b>Pearson<br/>chi<br/>square<br/>(df)</b> | <b>p-value</b> |
|------------------------------------------------|------------------------------|---------------------------|----------------------------------|--------------------------------------------|----------------|
| <b>Currently smoke tobacco products, n=694</b> |                              |                           |                                  |                                            |                |
| Yes                                            | 7 (1.0)                      | 7 (2.7)                   | 0 (0.0)                          | 11.87<br>(1)                               | <0.001*        |
| No                                             | 687<br>(99.0)                | 252<br>(97.3)             | 435 (100)                        |                                            |                |
| <b>Ever consumed alcohol, n=693</b>            |                              |                           |                                  |                                            |                |

|                                                                                                                  |                |                |             |              |         |
|------------------------------------------------------------------------------------------------------------------|----------------|----------------|-------------|--------------|---------|
| Yes                                                                                                              | 222<br>(32.0)  | 94 (36.4)      | 128 (29.4)  | 3.65 (1)     | 0.05    |
| No                                                                                                               | 471<br>(68.0)  | 164<br>(63.6)  | 307 (70.6)  |              |         |
| <b>Consumed alcohol in past 12 months, n=222</b>                                                                 |                |                |             |              |         |
| Yes                                                                                                              | 212<br>(95.5)  | 90 (94.7)      | 122 (96.1)  | 0.22 (1)     | 0.6     |
| No                                                                                                               | 10 (4.5)       | 5 (5.3)        | 5 (3.9)     |              |         |
| <b>Frequency of alcohol drinking in past 12 months, n=222</b>                                                    |                |                |             |              |         |
| 5-6 days per week                                                                                                | 1 (0.5)        | 0 (0.0)        | 1 (0.8)     | 38.50<br>(3) | <0.001* |
| 1-4 days per week                                                                                                | 25 (11.7)      | 18 (20.0)      | 7 (5.7)     |              |         |
| 1-3 days per week                                                                                                | 89 (41.8)      | 52 (57.8)      | 37 (30.1)   |              |         |
| Less than once a month                                                                                           | 97 (46.0)      | 20 (22.2)      | 78 (63.4)   |              |         |
| <b>Consumed alcohol within past 30 days, n=222</b>                                                               |                |                |             |              |         |
| Yes                                                                                                              | 134<br>(60.5)  | 68 (71.6)      | 67 (52.3)   | 8.44 (1)     | 0.004*  |
| no                                                                                                               | 88 (39.5)      | 27 (28.4)      | 61 (47.7)   |              |         |
| <b>Five or more drinks on a single occasion at least once during the past 30 days, n=135</b>                     |                |                |             |              |         |
| Yes                                                                                                              | 23 (17.0)      | 15 (5.8)       | 8 (1.8)     | 7.91 (1)     | 0.005*  |
| No                                                                                                               | 112<br>(83.0)  | 244<br>(94.2)  | 427 (98.2)  |              |         |
| <b>Number of drinking occasions in past 30 days among current (30 days) drinkers ( mean ± SD), n=134</b>         |                |                |             |              |         |
|                                                                                                                  | 2.53 ±<br>1.96 | 3.13 ±<br>2.14 | 1.92 ± 1.54 | Z = 4.63     | <0.001* |
| <b>Number of standard drinks per drinking occasion among current (past 30 days) drinkers ( mean ± SD), n=133</b> |                |                |             |              |         |
|                                                                                                                  | 2.35 ±<br>1.20 | 2.73 ±<br>1.29 | 1.97 ± 0.98 | Z = 3.77     | <0.001* |
| <b>Maximum number of standard drinks consumed on one occasion in the past 30 days ( mean ± SD), n=134</b>        |                |                |             |              |         |
|                                                                                                                  | 2.87 ±<br>.47  | 3.52 ±<br>1.63 | 2.24 ± 0.96 | Z = 5.33     | <0.001* |

243 Notes: Z, critical value for two-sample Wilcoxon rank-sum (Mann-Whitney) test; \*significant at  
 244 p < 0.05  
 245

## 246 Prevalence of central obesity

247 As described in **Table 4**, of the 259 men included in this study, 40 (15.44%, 95% CI: 11.26-  
248 20.43%) had waist circumference >94 centimeters. Of the 433 women included in the study, 230  
249 (53.12%, 95% CI: 48.29-57.89%) had a waist circumference greater than 80 centimeters. Based  
250 on the waist-to-hip ratios, 204 (47.11%, 95% CI: 42.32, 51.93%) and 129 (49.80%, 95% CI: 43.55-  
251 56.06%) of women and men had waist to hip ratio of greater than or equal to 0.85 and 0.90,  
252 respectively.

253 **Table 4:** Distribution of central obesity by sex among adult populations in administrative towns  
254 of Bale zone, Southeast Ethiopia, 2021.

| Central obesity distribution by sex            | Frequency | Percent (95% CI)    |
|------------------------------------------------|-----------|---------------------|
| <b>Men (n= 259)</b>                            |           |                     |
| Waist circumference > 94 centimeters           | 40        | 15.44 (11.26-20.43) |
| Waist circumference > 102 centimeters          | 9         | 3.47 (1.60-6.49)    |
| Waist to hip ratio $\geq$ 0.9                  | 129       | 49.81 (43.55-56.06) |
| <b>Women (n=433 )</b>                          |           |                     |
| Waist circumference > 80 centimeters           | 230       | 53.12 (48.29-57.89) |
| Waist circumference > 88 centimeters           | 118       | 27.19 (23.11-31.70) |
| Waist to hip ratio $\geq$ 0.85                 | 204       | 47.11 (42.32-51.93) |
| <b><sup>a</sup> Overall (both sexes) N=692</b> |           |                     |
| Centrally obese                                | 270       | 39.01 (35.36-42.76) |

255 **Notes:** <sup>a</sup> calculated using waist circumference >94 and >80 centimeters for men and women respectively.  
256

## 257 Factors associated with central (abdominal) obesity

258 Findings of the multivariable binary logistic regression analysis revealed that women had higher  
259 odds of central obesity compared to men (AOR:12.93, 95% CI: 6.74-24.79). Age groups 30-39  
260 (AOR: 2.80, 95% CI: 1.59-4.94), 40-49 (AOR: 7.66, 95% CI: 3.87-15.15), 50-59 (AOR: 4.65, 95%  
261 CI: 2.19-9.89), and  $\geq$ 60 years (AOR: 12.67 95% CI: 5.46-29.39) had higher odds of central obesity  
262 compared to those below 30 years old. Likewise, Government/Non-governmental/Private  
263 employees (AOR: 4.68, 95% CI: 1.47-14.88), self-employed (AOR: 4.63, 95% CI: 1.62-13.24),  
264 and housewives (AOR: 5.21, 95% CI: 1.85-14.62) were more likely to be centrally obese compared  
265 to unemployed or students. Moreover, those individuals who skip breakfast were a 54% reduced  
266 risk of central obesity compared to their counterparts (**Table 5**).

267 **Table 5:** Factors associated with central obesity among adult **men** in administrative towns of Bale  
268 zone, Southeast Ethiopia, 2021.

| Variables                                                    | Abdominal obesity |            | COR (95% CI)     | AOR <sup>a</sup> (95% CI) |
|--------------------------------------------------------------|-------------------|------------|------------------|---------------------------|
|                                                              | Yes               | No         |                  |                           |
|                                                              | n (%)             | n (%)      |                  |                           |
| <b>Residential town</b>                                      |                   |            |                  |                           |
| Goba                                                         | 124 (43.4)        | 162 (56.6) | 1.4 (1.0-1.8)    | 1.10 (0.72-1.70)          |
| Robe                                                         | 146 (36.0)        | 260 (64.0) | <b>1</b>         | <b>1</b>                  |
| <b>Sex</b>                                                   |                   |            |                  |                           |
| Male                                                         | 40 (15.4)         | 219 (84.6) | <b>1</b>         | <b>1</b>                  |
| Female                                                       | 230 (53.1)        | 203 (46.9) | 6.2 (4.2-9.1)*   | 12.93 (6.74-24.79)**      |
| <b>Age in years</b>                                          |                   |            |                  |                           |
| 18-29                                                        | 56 (21.4)         | 206 (78.6) | <b>1</b>         | <b>1</b>                  |
| 30-39                                                        | 59 (44.4)         | 74 (55.6)  | 2.9 (1.9-4.6)*   | 2.80 (1.59-4.94)**        |
| 40-49                                                        | 61 (59.2)         | 42 (40.8)  | 5.3 (3.3-8.7)*   | 7.66 (3.87-15.15)**       |
| 50-59                                                        | 37 (40.2)         | 55 (59.8)  | 2.5 (1.5-4.1)*   | 4.65 (2.19-9.89)**        |
| >=60                                                         | 56 (56.0)         | 44 (44.0)  | 4.7 (2.9-7.7)*   | 12.67 (5.46-29.39)**      |
| <b>Marital status</b>                                        |                   |            |                  |                           |
| Never married                                                | 19 (13.7)         | 120 (86.3) | <b>1</b>         | <b>1</b>                  |
| Married/cohabiting                                           | 195 (42.1)        | 268 (57.9) | 4.6 (2.7-7.7)*   | 1.38 (0.63-3.05)          |
| Divorced/separated/widowed                                   | 56 (62.2)         | 34 (37.8)  | 10.4 (5.5-19.8)* | 1.05 (0.40-2.78)          |
| <b>Educational status</b>                                    |                   |            |                  |                           |
| No formal education                                          | 62 (63.3)         | 36 (36.7)  | 4.9 (2.9-8.5)*   | 1.66 (0.70-3.90)          |
| Primary education (1-8)                                      | 100 (49.3)        | 103 (50.7) | 2.8 (1.8-4.3)*   | 1.38 (0.68-2.80)          |
| Secondary education (9-12)                                   | 64 (29.2)         | 155 (70.8) | 1.2 (0.8-1.9)    | 0.94 (0.48-1.86)          |
| Diploma and above                                            | 44 (25.7)         | 127 (74.3) | <b>1</b>         | <b>1</b>                  |
| <b>Occupational status</b>                                   |                   |            |                  |                           |
| House wives                                                  | 154 (61.1)        | 98 (38.9)  | 11.7 (6.0-22.4)* | 5.21 (1.85-14.62)**       |
| Self employed                                                | 57 (31.0)         | 127 (69.0) | 3.3 (1.7-6.6)*   | 4.63 (1.62-13.24)**       |
| Government/private/NGO employed                              | 33 (29.2)         | 80 (70.8)  | 3.1 (1.5-6.3)*   | 4.68 (1.47-14.88)**       |
| Retired                                                      | 12 (33.3)         | 24 (66.7)  | 3.7 (1.5-9.3)*   | 2.78 (0.73-10.48)         |
| Student/unemployed                                           | 12 (11.9)         | 89 (88.1)  | <b>1</b>         | <b>1</b>                  |
| <b>Family size</b>                                           |                   |            |                  |                           |
| ≤ 2                                                          | 28 (40.0)         | 42 (60.0)  | <b>1</b>         | -                         |
| > 2                                                          | 184 (37.9)        | 301 (62.1) | 0.9 (0.5-1.5)    | -                         |
| <b>Wealth index</b>                                          |                   |            |                  |                           |
| Low                                                          | 105 (41.3)        | 173(58.7)  | <b>1</b>         | <b>1</b>                  |
| Medium                                                       | 60 (37.5)         | 100 (62.5) | 0.9 (0.8-1.6)    | 0.69 (0.40-1.17)          |
| High                                                         | 105 (41.3)        | 149 (58.7) | 1.2 (0.8-1.6)    | 0.74 (0.45-1.22)          |
| <b>Fruit and/or vegetable consumption on average per day</b> |                   |            |                  |                           |

|                                                      |            |            |                |                    |
|------------------------------------------------------|------------|------------|----------------|--------------------|
| Less than five servings per day                      | 128 (36.4) | 224 (63.6) | 0.8 (0.5-1.1)  | 0.87 (0.57-1.32)   |
| Five or more servings per day                        | 108 (43.0) | 143 (57.0) | <b>1</b>       | <b>1</b>           |
| <b>Avoid eating foods prepared outside of a home</b> |            |            |                |                    |
| Yes                                                  | 245 (42.1) | 337 (57.9) | 1              | <b>1</b>           |
| No                                                   | 21 (19.8)  | 85 (80.2)  | 0.3 (0.2-0.6)* | 1.59 (0.79-3.18)   |
| <b>Skip breakfast</b>                                |            |            |                |                    |
| No                                                   | 242 (41.0) | 348 (59.0) | <b>1</b>       | <b>1</b>           |
| Yes                                                  | 27 (27.0)  | 73 (73.0)  | 0.1 (0.3-0.9)* | 0.46 (0.23-0.90)** |
| <b>Level of physical activity</b>                    |            |            |                |                    |
| Insufficient physical activity                       | 96 (49.5)  | 98 (50.5)  | 1.9 (1.3-2.6)* | 0.84 (0.55-1.30)   |
| Sufficient physical activity                         | 166 (34.5) | 315 (65.5) | <b>1</b>       | <b>1</b>           |

269 **Notes:** n, frequency; **COR**, crude odds ratio; **AOR**, adjusted odds ratio; **CI**, confidence interval;  
 270 <sup>a</sup>The model adjusted for: residence, sex, age, marital status, education status, occupation, fruit and  
 271 vegetable consumption, avoiding eating foods prepared outside the home, skipping breakfast and  
 272 level of physical activity; \*significant at  $p < 0.05$  (crude); \*\*significant at  $p < 0.05$  (adjusted).

## 273 Discussion

274 The findings of this study reveal that the overall prevalence of central (abdominal) obesity was  
 275 39.0%. In comparison to men, women had a higher prevalence of central obesity (53.1% vs  
 276 15.4%). The figures reported in this study are comparable with studies conducted in Gondar and  
 277 Dabat towns, Northwest Ethiopia (37.6% & 33.6%) (37, 43), but higher than the studies conducted  
 278 in Nekemte town, West Ethiopia (28.4%) (35), Woldia town, Northeast Ethiopia (15.5%) (36), and  
 279 Dilla town South Ethiopia (24.4%) (38). The possible variations of the obesity prevalence could  
 280 be explained by the use of different cutoff values for waist circumferences (36) and the variation  
 281 of age distributions between the studies participants (35, 38). Furthermore, variation in the gender  
 282 make-up of the samples might be a possible reason for the differences, given such large differences  
 283 in prevalence found in this study. Though there are slight variations in the prevalence rates across  
 284 the regions, the magnitude of central obesity in the study appeared to be high. A recent systematic  
 285 review and meta-analysis in Ethiopia reported that the prevalence of overweight and obesity is  
 286 increasing especially in urban settings (44). The results of the present study confirm these findings  
 287 and suggest that gender is a particularly important factor to examine when estimating overall  
 288 prevalence rates in Ethiopian regions.

289 In this study, women had 13 times higher odds of central obesity compared to men. This finding  
 290 is corroborated by similar studies in different parts of Ethiopia (35-39). Similarly, studies



291 conducted by *Jaacks et al.*, suggested that in countries with stage 1 obesity transition, the  
292 prevalence of obesity is higher among women compared to men (45). According to a study  
293 conducted by the Global Burden of Diseases report, the trend of obesity and overweight is  
294 persistently higher among women than men in developing countries (4). Further appropriately  
295 powered longitudinal studies within males and females in Ethiopia examining predictors of  
296 obesity/central obesity are warranted.

297 This study revealed that the odds of central obesity tend to increase as age increases. A longitudinal  
298 study conducted by *Baum & Ruhm* reported that body weight increases as age increases (46). The  
299 positive association between age and abdominal obesity is supported by several other studies  
300 conducted elsewhere including in Ethiopia, China, Russian Federation (35-37, 39, 47-50). This  
301 association might be explained partly by the gradual decline in physiologic activities and basal  
302 metabolic rate as age increases (51).

303 Employed adults and housewives had higher odds of central obesity compared to unemployed or  
304 students. This might be explained by the hypothesis that employed adults might have better access  
305 to foods than their counterparts. Previous studies in Ethiopia suggested that unemployed men are  
306 less likely to be obese compared to employed men (52). This finding contradicts a study conducted  
307 in North Glasgow, UK, which reported that unemployed men and women were less likely to be  
308 centrally obese compared to full-time workers (53). This contradiction needs to be addressed by  
309 conducting strong epidemiological studies exploring the role of employment status on the  
310 development of abdominal obesity in low-income countries. With regarding to findings of the  
311 higher odds of central obesity among housewives, it is plausible to hypothesis that staying at home  
312 exposes women to ease reach of food. As has stated elsewhere, frequency of meal intakes has  
313 been associated with an increase in total energy intake (54), hence increased opportunities to  
314 developing obesity.

315 Individuals who reported skipping their breakfast were 54% less likely to be centrally obese  
316 compared to their counterparts. This might be partly explained by the fact that frequency of meals  
317 is associated with an increase in total energy intake (54). However, this finding disagreed with a  
318 systematic review and meta-analysis conducted by *Ma et al.*, which reported skipping breakfast  
319 results in a 31% increase in abdominal obesity (55). In this study, breakfast skipping behavior was  
320 measured through self-report and the reason for skipping breakfast was not collected. Moreover,

321 meal frequency and portion size were not assessed, which could be a source of variation with  
322 existing evidence. Furthermore, this study was not topic-specific for the association between  
323 skipping breakfast and the risk of central obesity.

324 This study aimed to examine predictors of central (abdominal) obesity in a region with no prior  
325 evidence on the distribution and associated risk factors. Although the study used primary data on  
326 physical measurements like waist and hip circumferences and the WHO-STEPS wise tool for non-  
327 communicable disease risk factors surveillance with trained data collectors and supervisors, the  
328 findings must be interpreted in light of the following limitations. First, due to the cross-sectional  
329 nature of the study, a cause-effect relationship cannot be established between the risk factors and  
330 obesity. Secondly, the study sample was too small for sex and age-specific reporting of the  
331 prevalence and risk factors. Differences in prevalence and risk factors by gender suggest the need  
332 for gender-specific stratification in larger, appropriately powered longitudinal studies. Lastly, data  
333 regarding dietary habits, physical activity, alcohol, and tobacco use were collected through self-  
334 reported behavior questionnaires, which might be affected by the recall and social desirability bias.  
335 Future studies could use more objective measurements, including third part reporting and  
336 wearables to assess these behaviors.

## 337 **Conclusions**

338 The burden of abdominal obesity is high in southeast Ethiopia, especially in women, with one out  
339 of every two women and three out of every 10 men found to be centrally (abdominally) obese.  
340 Prevention strategies that account for identified modifiable risk factors are needed to curb the  
341 increasing burden of central obesity and its public health impact. Further studies of gender-specific  
342 risk factors are warranted.

## 343 **Acknowledgments**

344 We thank Madda Walabu University for the financial support to conduct this study. We are also  
345 grateful to all data collectors, Goba and Robe Health Office and Health extension workers, kebele  
346 and Got administrators for their facilitation and cooperation to smoothly conduct this study.

## 347 **References**

- 348 1. World Health Organization. Obesity and overweight 2021 [updated 9 June 2021].  
349 Available from: <https://www.who.int/news-room/fact-sheets/detail/obesity-and-overweight>.
- 350 2. Kelishadi R, Hashemi Pour M, Sarraf-Zadegan N, Sadry GH, Ansari R, Alikhassy H, et  
351 al. Obesity and associated modifiable environmental factors in Iranian adolescents: Isfahan  
352 Healthy Heart Program– heart health promotion from childhood. *Pediatrics international*.  
353 2003;45(4):435-42.
- 354 3. Hruby A, Hu FB. The Epidemiology of Obesity: A Big Picture. *PharmacoEconomics*.  
355 2015;33(7):673-89.
- 356 4. Ng M, Fleming T, Robinson M, Thomson B, Graetz N, Margono C, et al. Global,  
357 regional, and national prevalence of overweight and obesity in children and adults during 1980-  
358 2013: a systematic analysis for the Global Burden of Disease Study 2013. *Lancet (London,*  
359 *England)*. 2014;384(9945):766-81.
- 360 5. Kelly T, Yang W, Chen CS, Reynolds K, He J. Global burden of obesity in 2005 and  
361 projections to 2030. *International journal of obesity (2005)*. 2008;32(9):1431-7.
- 362 6. Afshin A, Forouzanfar MH, Reitsma MB, Sur P, Estep K, Lee A, et al. Health Effects of  
363 Overweight and Obesity in 195 Countries over 25 Years. *The New England journal of medicine*.  
364 2017;377(1):13-27.
- 365 7. Hubert HB, Feinleib M, McNamara PM, Castelli WP. Obesity as an independent risk  
366 factor for cardiovascular disease: a 26-year follow-up of participants in the Framingham Heart  
367 Study. *Circulation*. 1983;67(5):968-77.
- 368 8. Calle EE, Rodriguez C, Walker-Thurmond K, Thun MJ. Overweight, obesity, and  
369 mortality from cancer in a prospectively studied cohort of US adults. *New England Journal of*  
370 *Medicine*. 2003;348(17):1625-38.
- 371 9. Molarius A, Seidell J. Selection of anthropometric indicators for classification of  
372 abdominal fatness—a critical review. *International journal of obesity*. 1998;22(8):719.
- 373 10. Kragelund C, Omland T. A farewell to body-mass index? *The Lancet*.  
374 2005;366(9497):1589-91.
- 375 11. Sowers JR. Obesity as a cardiovascular risk factor. *The American journal of medicine*.  
376 2003;115(8):37-41.
- 377 12. Tabrizi JS, Sadeghi-Bazargani H, Farahbakhsh M, Nikniaz L, Nikniaz Z. Prevalence and  
378 associated factors of prehypertension and hypertension in Iranian Population: The Lifestyle  
379 Promotion Project (LPP). *PloS one*. 2016;11(10):e0165264.
- 380 13. Larsson SC, Wolk A. Obesity and the risk of gallbladder cancer: a meta-analysis. *British*  
381 *journal of cancer*. 2007;96(9):1457-61.
- 382 14. Larsson SC, Wolk A. Overweight, obesity and risk of liver cancer: a meta-analysis of  
383 cohort studies. *British journal of cancer*. 2007;97(7):1005-8.
- 384 15. Larsson SC, Wolk A. Obesity and risk of non-Hodgkin's lymphoma: a meta-analysis.  
385 *International journal of cancer*. 2007;121(7):1564-70.
- 386 16. Larsson SC, Wolk A. Overweight and obesity and incidence of leukemia: a meta-analysis  
387 of cohort studies. *International journal of cancer*. 2008;122(6):1418-21.
- 388 17. Ohlson L-O, Larsson B, Svärdsudd K, Welin L, Eriksson H, Wilhelmsen L, et al. The  
389 influence of body fat distribution on the incidence of diabetes mellitus: 13.5 years of follow-up  
390 of the participants in the study of men born in 1913. *Diabetes*. 1985;34(10):1055-8.

- 391 18. Polednak AP. Estimating the number of U.S. incident cancers attributable to obesity and  
392 the impact on temporal trends in incidence rates for obesity-related cancers. *Cancer detection and*  
393 *prevention*. 2008;32(3):190-9.
- 394 19. Olsen CM, Green AC, Whiteman DC, Sadeghi S, Kolaheooz F, Webb PM. Obesity and  
395 the risk of epithelial ovarian cancer: a systematic review and meta-analysis. *European journal of*  
396 *cancer (Oxford, England : 1990)*. 2007;43(4):690-709.
- 397 20. Kodama S, Horikawa C, Fujihara K, Yoshizawa S, Yachi Y, Tanaka S, et al. Quantitative  
398 relationship between body weight gain in adulthood and incident type 2 diabetes: a meta-  
399 analysis. *Obesity reviews : an official journal of the International Association for the Study of*  
400 *Obesity*. 2014;15(3):202-14.
- 401 21. Reilly JJ, Kelly J. Long-term impact of overweight and obesity in childhood and  
402 adolescence on morbidity and premature mortality in adulthood: systematic review. *International*  
403 *journal of obesity (2005)*. 2011;35(7):891-8.
- 404 22. Narayan KM, Boyle JP, Thompson TJ, Gregg EW, Williamson DF. Effect of BMI on  
405 lifetime risk for diabetes in the U.S. *Diabetes Care*. 2007;30(6):1562-6.
- 406 23. Organization WH. Waist circumference and waist-hip ratio: report of a WHO expert  
407 consultation, Geneva, 8-11 December 2008. 2011.
- 408 24. Sahakyan KR, Somers VK, Rodriguez-Escudero JP, Hodge DO, Carter RE, Sochor O, et  
409 al. Normal-Weight Central Obesity: Implications for Total and Cardiovascular Mortality. *Annals*  
410 *of internal medicine*. 2015;163(11):827-35.
- 411 25. Coutinho T, Goel K, Corrêa de Sá D, Carter RE, Hodge DO, Kragelund C, et al.  
412 Combining body mass index with measures of central obesity in the assessment of mortality in  
413 subjects with coronary disease: role of "normal weight central obesity". *Journal of the American*  
414 *College of Cardiology*. 2013;61(5):553-60.
- 415 26. Eshete T, Kumera G, Bazezew Y, Marie T, Alemu S, Shiferaw K. The coexistence of  
416 maternal overweight or obesity and child stunting in low-income country: Further data analysis  
417 of the 2016 Ethiopia demographic health survey (EDHS). *Scientific African*. 2020;9:e00524.
- 418 27. Popkin BM, Corvalan C, Grummer-Strawn LM. Dynamics of the double burden of  
419 malnutrition and the changing nutrition reality. *Lancet (London, England)*. 2020;395(10217):65-  
420 74.
- 421 28. Boutayeb A. The double burden of communicable and non-communicable diseases in  
422 developing countries. *Transactions of the Royal Society of Tropical Medicine and Hygiene*.  
423 2006;100(3):191-9.
- 424 29. Bollyky TJ, Templin T, Cohen M, Dieleman JL. Lower-Income Countries That Face The  
425 Most Rapid Shift In Noncommunicable Disease Burden Are Also The Least Prepared. *Health*  
426 *affairs (Project Hope)*. 2017;36(11):1866-75.
- 427 30. Bong C-L, Brasher C, Chikumba E, McDougall R, Mellin-Olsen J, Enright A. The  
428 COVID-19 pandemic: effects on low-and middle-income countries. *Anesthesia and analgesia*.  
429 2020.
- 430 31. Tan MK. COVID-19 in an inequitable world: the last, the lost and the least. Oxford  
431 University Press; 2021. p. 493-6.
- 432 32. Misganaw A, Haregu TN, Deribe K, Tessema GA, Deribew A, Melaku YA, et al.  
433 National mortality burden due to communicable, non-communicable, and other diseases in  
434 Ethiopia, 1990–2015: findings from the Global Burden of Disease Study 2015. *Population*  
435 *Health Metrics*. 2017;15(1):29.

- 436 33. Misganaw A, Melaku YA, Tessema GA, Deribew A, Deribe K, Abera SF, et al. National  
437 disability-adjusted life years (DALYs) for 257 diseases and injuries in Ethiopia, 1990–2015:  
438 findings from the global burden of disease study 2015. *Population Health Metrics*.  
439 2017;15(1):28.
- 440 34. Janakiraman B, Abebe SM, Chala MB, Demissie SF. Central obesity, not BMI explains  
441 cardio-metabolic risks among university employees, Ethiopia—a cross-sectional study. 2019.
- 442 35. Biru B, Tamiru D, Taye A, Regassa Feyisa B. Central obesity and its predictors among  
443 adults in Nekemte town, West Ethiopia. *SAGE open medicine*. 2021;9:20503121211054988.
- 444 36. Dagne S, Menber Y, Petrucka P, Wassihun Y. Prevalence and associated factors of  
445 abdominal obesity among the adult population in Woldia town, Northeast Ethiopia, 2020:  
446 Community-based cross-sectional study. *PloS one*. 2021;16(3):e0247960.
- 447 37. Derbew Molla M, Fekadu Wolde H. Magnitude of Central Obesity and its Associated  
448 Factors Among Adults in Urban Areas of Northwest Ethiopia. 2021.
- 449 38. Tesfaye TS, Zeleke TM, Alemu W, Argaw D, Bedane TK. Dietary diversity and physical  
450 activity as risk factors of abdominal obesity among adults in Dilla town, Ethiopia. *PloS one*.  
451 2020;15(7):e0236671.
- 452 39. Yazew G, Abate A, Alemseged F, Tewelde T. Factors Associated with Overweight and  
453 Central Obesity in Adults at Gilgel Gibe Field Research Center, Southwest Ethiopia: A  
454 Secondary Analysis of Data. 2019.
- 455 40. Bonita R, Winkelmann R, Douglas KA, de Courten M. The WHO Stepwise approach to  
456 surveillance (STEPS) of non-communicable disease risk factors. *Global behavioral risk factor*  
457 *surveillance*: Springer; 2003. p. 9-22.
- 458 41. Organization WH. The WHO STEPwise approach to noncommunicable disease risk  
459 factor surveillance. Geneva: World Health Organization. 2005.
- 460 42. Kim JH. Multicollinearity and misleading statistical results. *Korean journal of*  
461 *anesthesiology*. 2019;72(6):558.
- 462 43. Janakiraman B, Abebe SM, Chala MB, Demissie SF. Epidemiology of general, central  
463 obesity and associated cardio-metabolic risks among University Employees, Ethiopia: a cross-  
464 sectional study. *Diabetes, metabolic syndrome and obesity: targets and Therapy*. 2020;13:343.
- 465 44. Kassie AM, Abate BB, Kassaw MW. Prevalence of overweight/obesity among the adult  
466 population in Ethiopia: a systematic review and meta-analysis. *BMJ open*. 2020;10(8):e039200.
- 467 45. Jaacks LM, Vandevijvere S, Pan A, McGowan CJ, Wallace C, Imamura F, et al. The  
468 obesity transition: stages of the global epidemic. *The lancet Diabetes & endocrinology*.  
469 2019;7(3):231-40.
- 470 46. Baum CL, 2nd, Ruhm CJ. Age, socioeconomic status and obesity growth. *Journal of*  
471 *health economics*. 2009;28(3):635-48.
- 472 47. Wang H, Wang J, Liu M-M, Wang D, Liu Y-Q, Zhao Y, et al. Epidemiology of general  
473 obesity, abdominal obesity and related risk factors in urban adults from 33 communities of  
474 northeast china: the CHPSNE study. *BMC Public Health*. 2012;12(1):967.
- 475 48. Munyogwa MJ, Mtumwa AH. The Prevalence of Abdominal Obesity and Its Correlates  
476 among the Adults in Dodoma Region, Tanzania: A Community-Based Cross-Sectional Study.  
477 *Advances in medicine*. 2018;2018:6123156.
- 478 49. Malik SK, Kouame J, Gbane M, Coulibaly M, Ake MD, Ake O. Prevalence of abdominal  
479 obesity and its correlates among adults in a peri-urban population of West Africa. *AIMS public*  
480 *health*. 2019;6(3):334-44.

- 481 50. Zhernakova YV, Zheleznova EA, Chazova IE, Oshchepkova EV, Dolgusheva YA,  
482 Yarovaya EB, et al. The prevalence of abdominal obesity and the association with  
483 socioeconomic status in Regions of the Russian Federation, the results of the epidemiological  
484 study - ESSE-RF. *Terapevticheskii arkhiv*. 2018;90(10):14-22.
- 485 51. Henry CJ. Mechanisms of changes in basal metabolism during ageing. *European journal*  
486 *of clinical nutrition*. 2000;54 Suppl 3:S77-91.
- 487 52. Tekalegn Y, Engida ZT, Sahiledengle B, Rogers HL, Seyoum K, Woldeyohannes D, et  
488 al. Individual and community-level determinants of overweight and obesity among urban men:  
489 Further analysis of the Ethiopian demographic and health survey. *PloS one*.  
490 2021;16(11):e0259412.
- 491 53. Chen R, Tunstall-Pedoe H. Socioeconomic deprivation and waist circumference in men  
492 and women: The Scottish MONICA surveys 1989 –1995. *European Journal of Epidemiology*.  
493 2005;20(2):141-7.
- 494 54. Sievert K, Hussain SM, Page MJ, Wang Y, Hughes HJ, Malek M, et al. Effect of  
495 breakfast on weight and energy intake: systematic review and meta-analysis of randomised  
496 controlled trials. *BMJ (Clinical research ed)*. 2019;364:l42.
- 497 55. Ma X, Chen Q, Pu Y, Guo M, Jiang Z, Huang W, et al. Skipping breakfast is associated  
498 with overweight and obesity: A systematic review and meta-analysis. (1871-403X (Print)).

## 499 **Supporting information**

500 Figure 1: Map of Goba and Robe town, Southeast Ethiopia



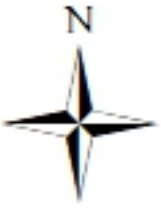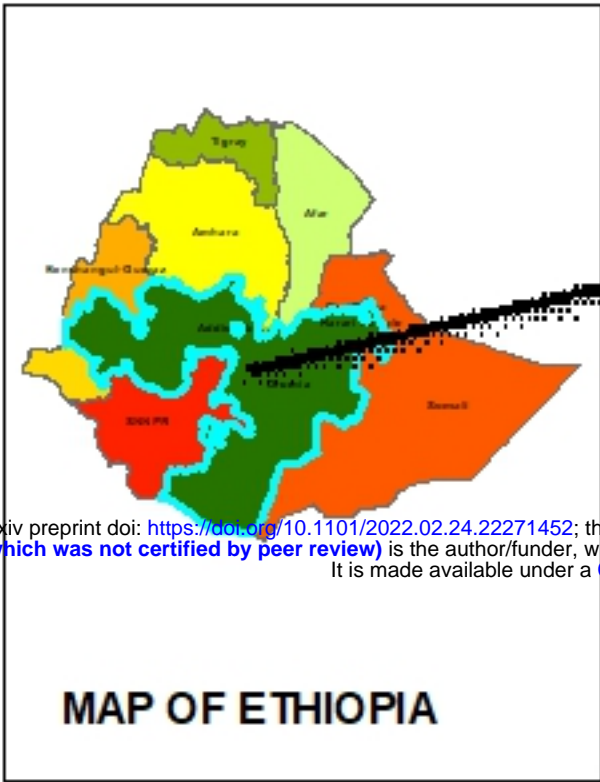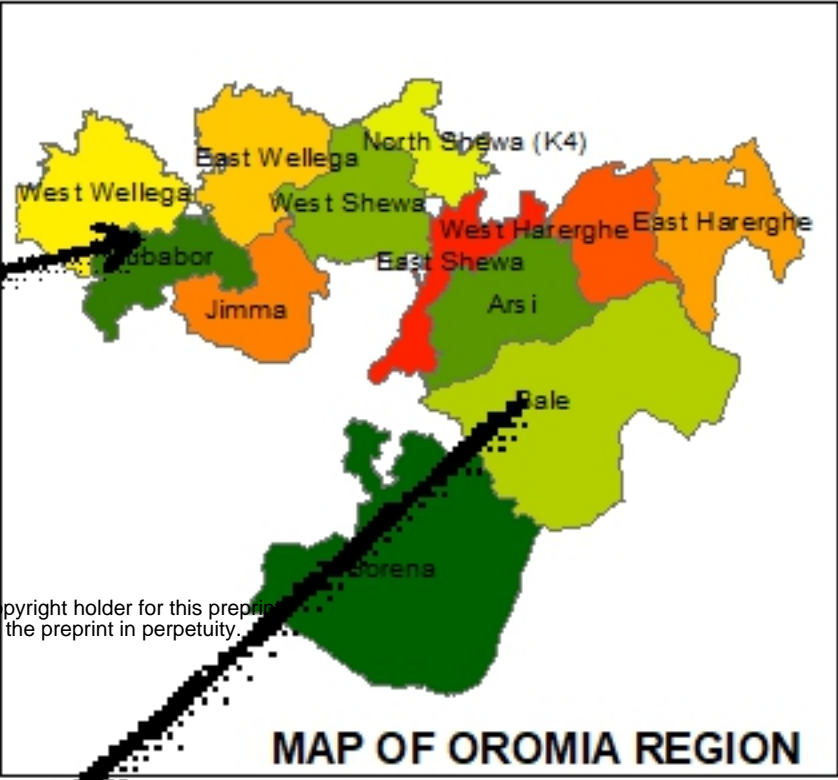

medRxiv preprint doi: <https://doi.org/10.1101/2022.02.24.22271452>; this version posted February 25, 2022. The copyright holder for this preprint (which was not certified by peer review) is the author/funder, who has granted medRxiv a license to display the preprint in perpetuity. It is made available under a [CC-BY 4.0 International license](https://creativecommons.org/licenses/by/4.0/).

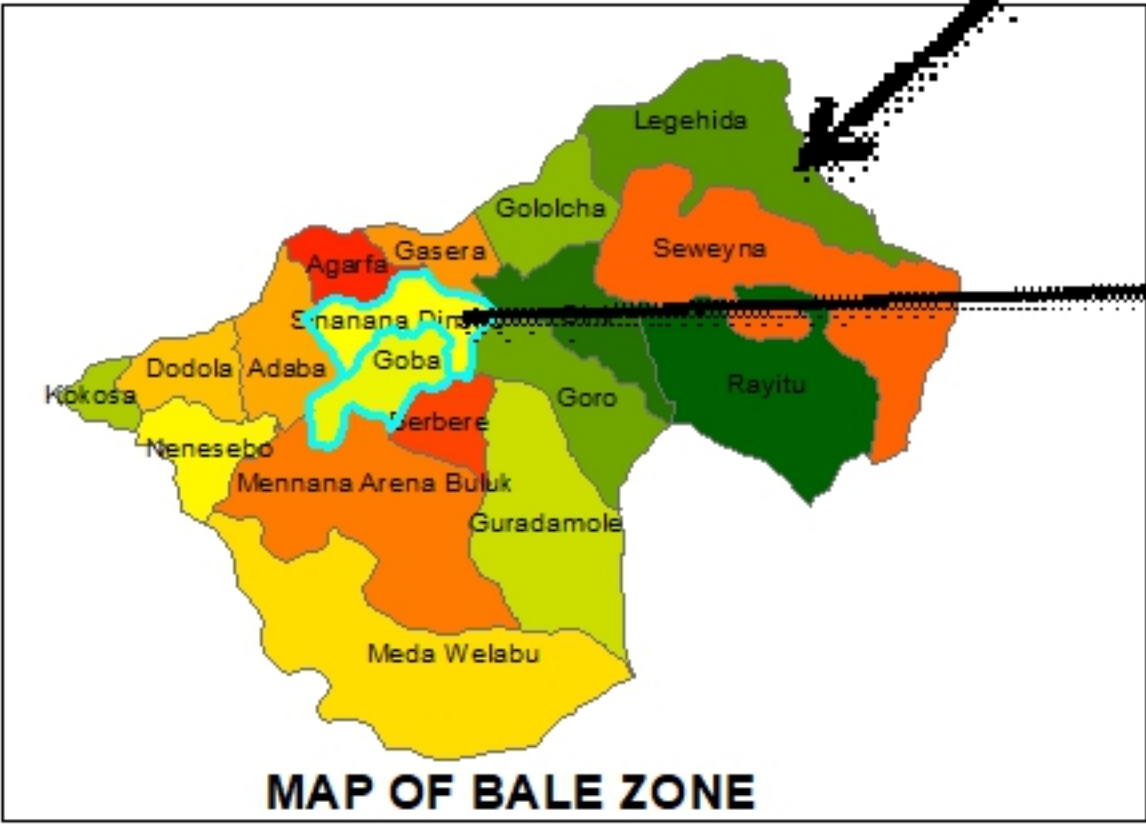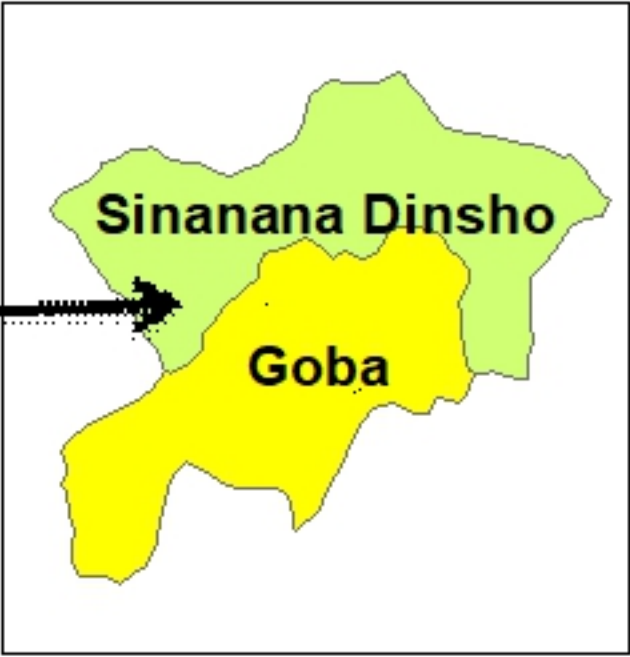

**Legend**

- Goba
- Sinanana Dinsho

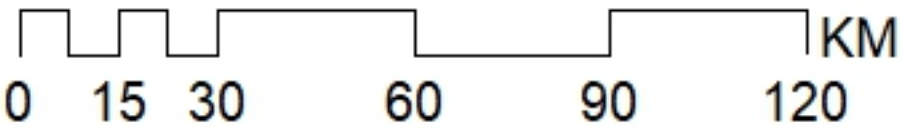

Figure
